# Supplementary material
Source: PubMed Central journal article supplement (PMC3652256)
Supplement: NIHMS461907-supplement-Supplementary_Appendix.pdf [file NIHMS461907-supplement-Supplementary_Appendix.pdf]

## Supplementary Appendix

This appendix has been provided by the authors to give readers additional information about their work.

Supplement to: Chan PS, Nallamothu BK, Krumholz HM, et al. Long-term outcomes in elderly survivors of in-hospital cardiac arrest. *N Engl J Med* 2013;368:1019-26. DOI: [10.1056/NEJMoa1200657](https://doi.org/10.1056/NEJMoa1200657)

## Supplementary Appendix

|     |                                                                                                                                                                          |    |
|-----|--------------------------------------------------------------------------------------------------------------------------------------------------------------------------|----|
| 1.  | American Heart Association Get With the Guidelines-Resuscitation (formerly the National Registry of Cardiopulmonary Resuscitation) Investigators.....                    | 2  |
| 2.  | Figure S1. Derivation of the Study Cohort.....                                                                                                                           | 3  |
| 3.  | Figure S2. Trends in 1-Year Risk-Adjusted Survival by Cardiac Arrest Rhythm.....                                                                                         | 4  |
| 4.  | Figure S3. Kaplan-Meier Estimates of Freedom from Readmission Among Survivors of In-Hospital Cardiac Arrest, Overall and by Discharge Neurological Status (CPC Score)... | 6  |
| 5.  | Table S1. Baseline Characteristics of Patients Matched and Not Matched to Medicare Files.....                                                                            | 7  |
| 6.  | Table S2. Discharge Destination by Patient Subgroups.....                                                                                                                | 9  |
| 7.  | Table S3. Adjusted Associations between Patient Characteristics and 1-Year Survival, Full Model Results.....                                                             | 10 |
| 8.  | Table S4. Temporal Trends in 1-Year Unadjusted Survival, Stratified by Rhythm Type.....                                                                                  | 11 |
| 9.  | Table S5. Risk-Adjusted Rates of 2-Year Survival for Pre-Specified Subgroups.....                                                                                        | 12 |
| 10. | Table S6. Adjusted Associations between Selected Patient Characteristics and 2-Year Readmission.....                                                                     | 13 |

**American Heart Association Get With the Guidelines-Resuscitation (formerly the National Registry of Cardiopulmonary Resuscitation) Investigators**

Besides the author Paul S. Chan, MD, MSc, members of GWTG-Resuscitation include:

Robert A. Berg, MD, Children's Hospital of Philadelphia; Emilie Allen, MSN, RN, Parkland Health & Hospital System; Michael W. Donnino, MD, Beth Israel Deaconess Medical Center; Dana P. Edelson, MD, MS, University of Chicago Medical Center; Kathy Duncan, Institute for Healthcare Improvement; Brian Eigel, PhD and Lana Gent, PhD, American Heart Association; Robert T. Faillace, MD, St. Joseph's Regional Medical Center; Romergryko G. Geocadin, MD, Johns Hopkins School of Medicine; Elizabeth A. Hunt, MD, MPH, PhD, Johns Hopkins Medicine Simulation Center; Lynda Knight, RN, Lucile Packard Children's Hospital at Stanford; Kenneth LaBresh, MD, RTI International; Mary E. Mancini, RN, PhD, University of Texas at Arlington; Vinay M. Nadkarni, MD, University of Pennsylvania School of Medicine; Graham Nichol, MD, MPH and Samuel A. Warren, MD, University of Washington; Mary Ann Peberdy, MD and Joseph P. Ornato, MD, Virginia Commonwealth University Health System; Comilla Sasson, MD, MS, University of Colorado; and Mindy Smyth, MSN, RN.

**Figure S1.** Derivation of the Study Cohort

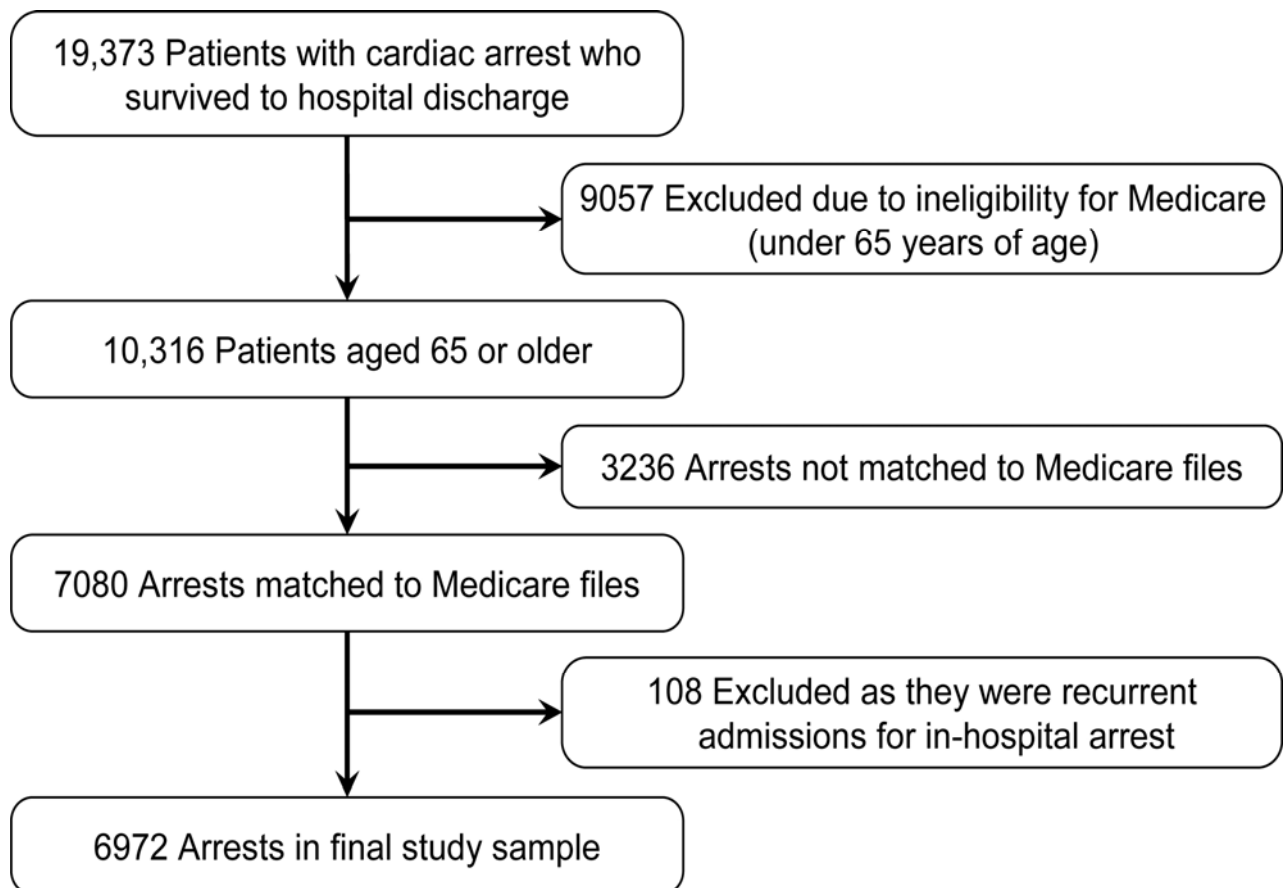

**Figure S2.** Trends in 1-Year Risk-Adjusted Survival by Cardiac Arrest Rhythm.\* No significant survival trend was observed for either rhythm group.

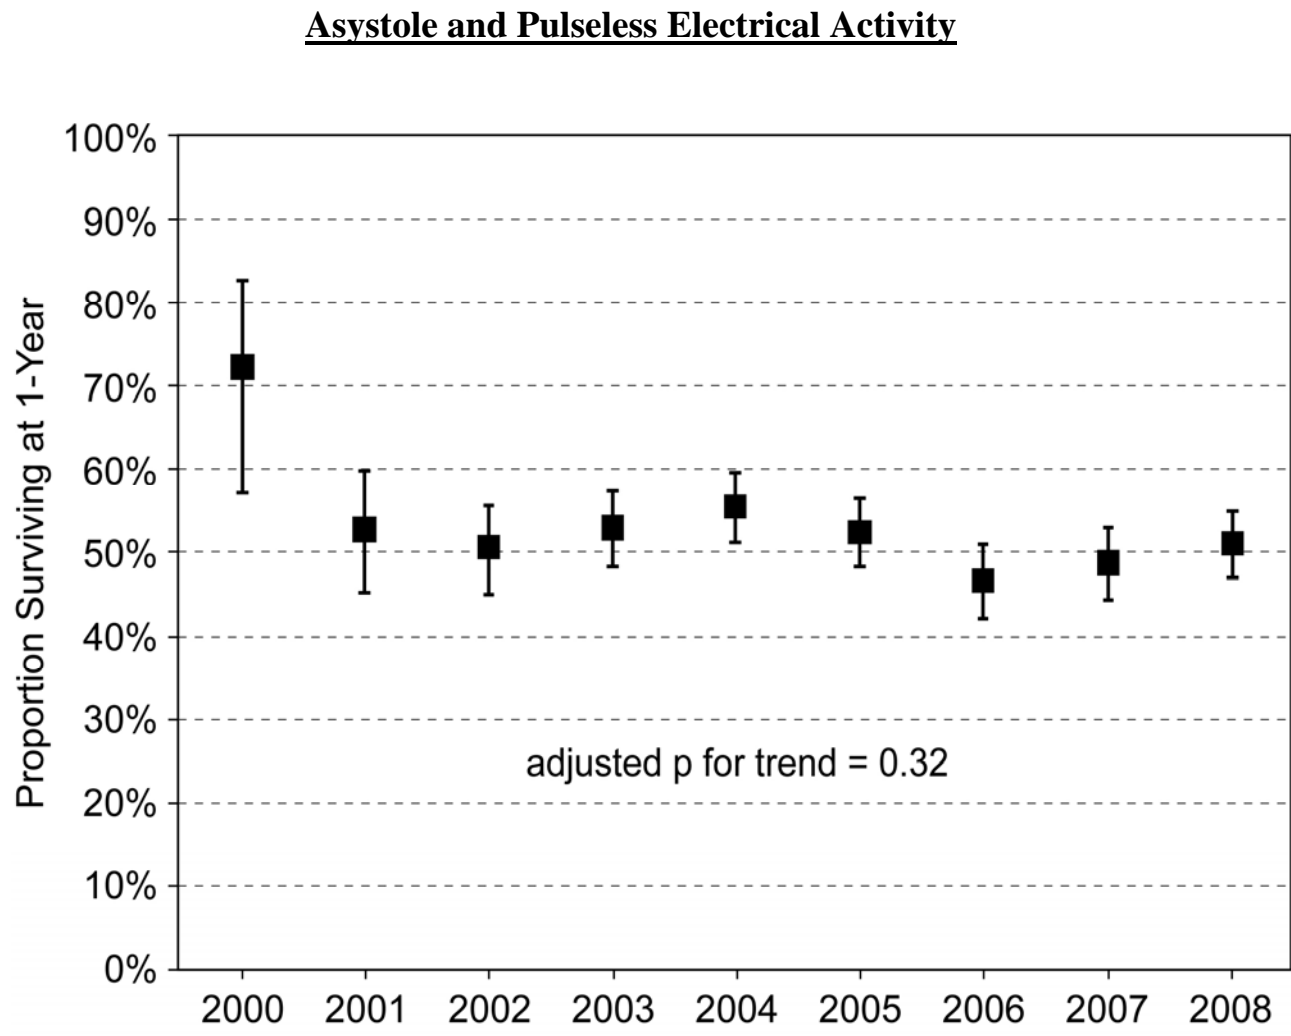

\* Multivariable hierarchical model adjusted for hospital site and the variables listed in Table S1.

Figure S2 (continued).

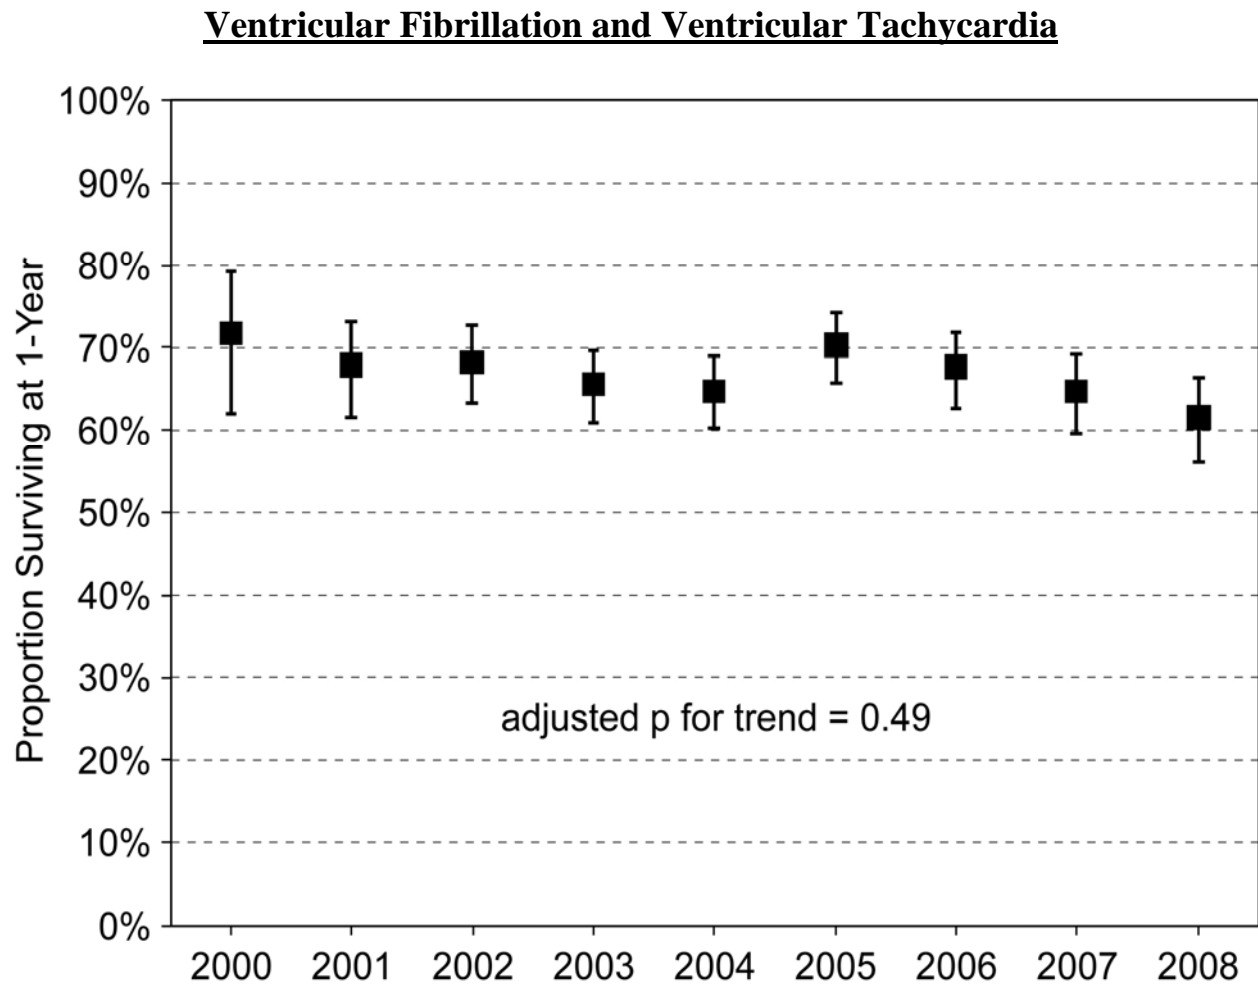

\* Multivariable hierarchical model adjusted for hospital site and the variables listed in Table S1.

**Figure S3.** Kaplan-Meier Estimates of Freedom from Readmission Among Survivors of In-Hospital Cardiac Arrest, Overall and by Discharge Neurological Status (CPC Score).

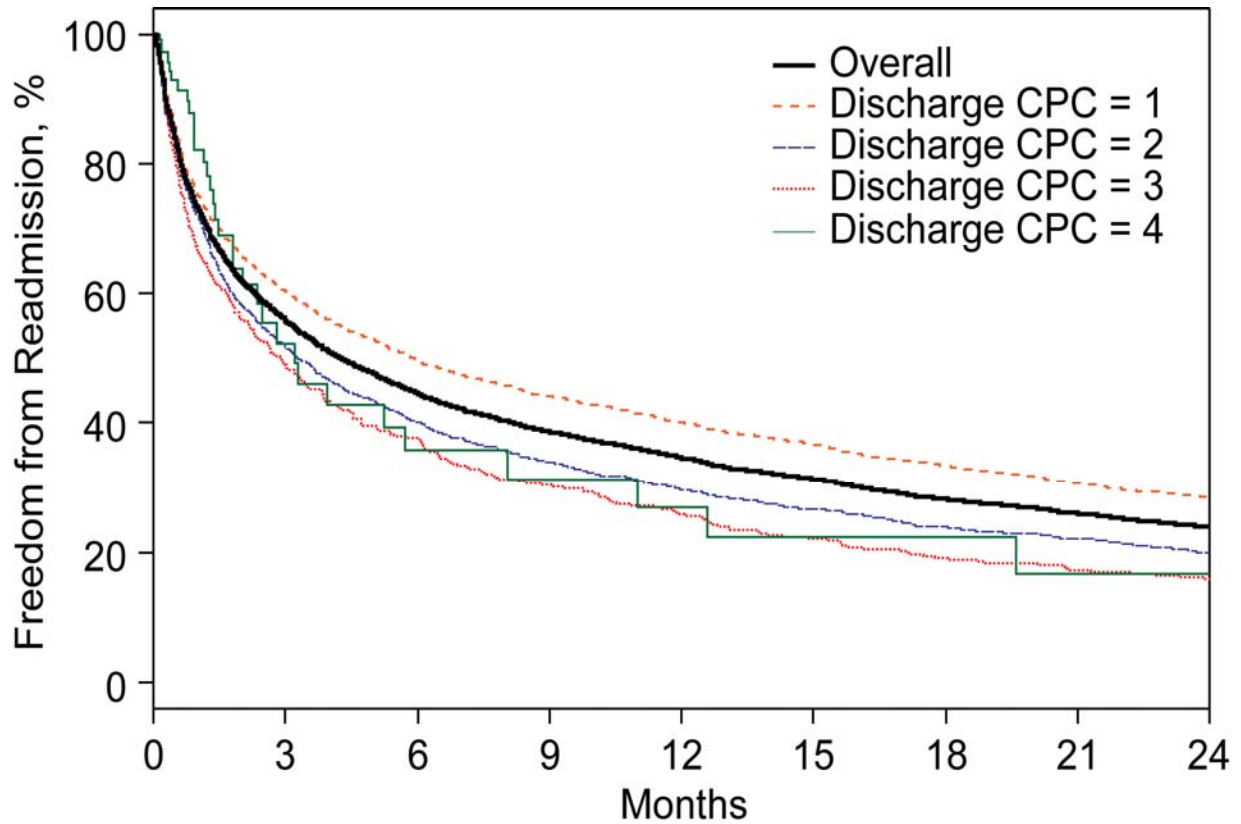

| Time (Months)     | 1    | 3    | 6    | 12   | 18   | 24   |
|-------------------|------|------|------|------|------|------|
| Overall, %        | 73.3 | 55.6 | 44.4 | 34.4 | 28.1 | 23.8 |
| Discharge CPC = 1 | 75.2 | 60.0 | 49.4 | 39.9 | 33.2 | 28.4 |
| Discharge CPC = 2 | 72.0 | 51.4 | 39.9 | 29.5 | 23.7 | 19.8 |
| Discharge CPC = 3 | 66.6 | 48.5 | 36.9 | 25.7 | 18.9 | 15.7 |
| Discharge CPC = 4 | 82.3 | 52.4 | 35.7 | 26.8 | 22.3 | 16.8 |

**Table S1.** Baseline Characteristics For Patients Matched and Not Matched to Medicare Files

| Characteristic                                     | Patients Matched<br>(n = 6972) | Patients<br>Not Matched<br>(n = 3236) | Standardized<br>Difference* |
|----------------------------------------------------|--------------------------------|---------------------------------------|-----------------------------|
| Demographic characteristics                        |                                |                                       |                             |
| Age — yr                                           | 75.8 ± 7.0                     | 75.2 ± 7.0                            | 9.1                         |
| Male sex, no. (%)                                  | 3872 (55.5)                    | 1890 (58.4)                           | 5.8                         |
| Race, no. (%)†                                     |                                |                                       |                             |
| White                                              | 5634 (85.7)                    | 2396 (82.8)                           | Reference                   |
| Black                                              | 778 (11.8)                     | 365 (12.6)                            | 2.4                         |
| Other                                              | 164 (2.5)                      | 132 (4.6)                             | 11.2                        |
| Cardiac arrest characteristics, no. (%)            |                                |                                       |                             |
| After hours (11:00 pm–6:59 am)                     | 1763 (25.3)                    | 837 (26.3)                            | 1.4                         |
| Weekend                                            | 1908 (27.4)                    | 893 (27.6)                            | 0.5                         |
| Hospital-wide response activated                   | 5432 (77.9)                    | 2556 (79.0)                           | 2.6                         |
| Use of automated external defibrillator            | 706 (10.1)                     | 340 (10.5)                            | 1.3                         |
| Initial cardiac arrest rhythm                      |                                |                                       |                             |
| Asystole                                           | 1707 (24.5)                    | 865 (26.7)                            | Reference                   |
| Pulseless electrical activity                      | 2031 (29.1)                    | 958 (29.6)                            | 1.0                         |
| Pulseless ventricular tachycardia                  | 1109 (15.9)                    | 521 (16.1)                            | 0.5                         |
| Ventricular fibrillation                           | 2125 (30.5)                    | 892 (27.6)                            | 6.4                         |
| CPC score at discharge, no. (%)‡                   |                                |                                       |                             |
| 1 (mild to no neurological disability)             | 2943 (48.1)                    | 1277 (46.5)                           | Reference                   |
| 2 (moderate neurological disability)               | 2097 (34.3)                    | 902 (32.9)                            | 3.0                         |
| ≥3 (severe neurological disability or coma)        | 1074 (17.6)                    | 565 (20.6)                            | 7.7                         |
| Preexisting conditions, no. (%)                    |                                |                                       |                             |
| Acute stroke                                       | 249 (3.6)                      | 115 (3.6)                             | 0.1                         |
| Baseline depression in CNS function                | 736 (10.6)                     | 293 (9.1)                             | 5.1                         |
| Diabetes mellitus                                  | 2262 (32.4)                    | 1043 (32.2)                           | 0.5                         |
| Heart failure during admission                     | 1625 (23.3)                    | 686 (21.2)                            | 5.1                         |
| Heart failure prior to admission                   | 1848 (26.5)                    | 800 (24.7)                            | 4.1                         |
| Hepatic insufficiency                              | 143 (2.1)                      | 78 (2.4)                              | 2.4                         |
| Hypotension                                        | 1313 (18.8)                    | 588 (18.2)                            | 1.7                         |
| Major trauma                                       | 113 (1.6)                      | 62 (1.9)                              | 2.2                         |
| Metabolic or electrolyte abnormality               | 770 (11.0)                     | 364 (11.2)                            | 0.7                         |
| Metastatic or hematologic malignancy               | 518 (7.4)                      | 222 (6.9)                             | 2.2                         |
| Myocardial infarction during admission             | 1897 (27.2)                    | 842 (26.0)                            | 2.7                         |
| Myocardial infarction prior to admission           | 1805 (25.9)                    | 742 (22.9)                            | 6.9                         |
| Pneumonia                                          | 725 (10.4)                     | 291 (9.0)                             | 4.8                         |
| Renal insufficiency                                | 1836 (26.3)                    | 743 (23.0)                            | 7.8                         |
| Respiratory insufficiency                          | 2368 (34.0)                    | 1038 (32.1)                           | 4.0                         |
| Septicemia                                         | 473 (6.8)                      | 213 (6.6)                             | 0.8                         |
| Interventions in place, no. (%)                    |                                |                                       |                             |
| Mechanical ventilation                             | 1246 (17.9)                    | 564 (17.4)                            | 1.2                         |
| Dialysis                                           | 136 (2.0)                      | 58 (1.8)                              | 1.3                         |
| Preexisting implantable cardioverter-defibrillator | 109 (1.6)                      | 51 (1.6)                              | 0.0                         |

Abbreviations: CNS, central nervous system; and CPC, Cerebral Performance Category.

\* Due to the large sample size, a standardized difference of >10 was used to denote significant differences between groups



† Race was missing for 396 patients who matched and 343 patients who did not match.

‡ CPC score was missing for 858 patients who matched and 492 patients who did not match.

**Table S2.** Discharge Destination by Patient Subgroups

|                                      |                                        | <u>HOME</u> |             | <u>INPATIENT</u> |                |       |         |
|--------------------------------------|----------------------------------------|-------------|-------------|------------------|----------------|-------|---------|
|                                      |                                        | Self-care   | Home Health | Skilled Nursing  | Rehabilitation | Other | Hospice |
| <b>Age</b>                           | 65 to 74                               | 31.9%       | 14.8%       | 20.4%            | 28.6%          | 0.6%  | 3.7%    |
|                                      | 75 to 84                               | 21.7%       | 14.0%       | 32.3%            | 26.6%          | 0.4%  | 5.0%    |
|                                      | ≥ 85                                   | 15.8%       | 13.6%       | 41.6%            | 20.6%          | 0.4%  | 8.0%    |
| <b>Sex</b>                           | Men                                    | 28.3%       | 14.3%       | 25.3%            | 27.2%          | 0.6%  | 4.4%    |
|                                      | Women                                  | 22.4%       | 14.4%       | 31.4%            | 26.3%          | 0.3%  | 5.3%    |
| <b>Race</b>                          | White                                  | 26.7%       | 14.3%       | 27.9%            | 26.1%          | 0.4%  | 4.7%    |
|                                      | Black                                  | 18.9%       | 12.7%       | 31.8%            | 32.0%          | 0.3%  | 4.4%    |
|                                      | Other                                  | 21.3%       | 18.9%       | 20.7%            | 31.1%          | 0.6%  | 7.3%    |
| <b>Initial cardiac arrest rhythm</b> | Asystole                               | 20.6%       | 12.9%       | 30.7%            | 29.9%          | 0.6%  | 5.3%    |
|                                      | Pulseless Electrical Activity          | 17.6%       | 13.9%       | 31.9%            | 29.6%          | 0.5%  | 6.4%    |
|                                      | Ventricular Fibrillation               | 35.0%       | 14.7%       | 23.6%            | 23.6%          | 0.4%  | 2.8%    |
|                                      | Pulseless Ventricular Tachycardia      | 30.3%       | 16.5%       | 25.1%            | 22.9%          | 0.5%  | 4.8%    |
| <b>CPC score at discharge</b>        | 1 (mild to no neurological disability) | 39.0%       | 19.8%       | 19.3%            | 20.3%          | 0.4%  | 1.2%    |
|                                      | 2 (moderate neurological disability)   | 17.1%       | 12.8%       | 35.7%            | 30.0%          | 0.4%  | 4.0%    |
|                                      | 3 (severe neurological disability)     | 5.2%        | 5.0%        | 41.4%            | 36.1%          | 0.2%  | 12.1%   |
|                                      | 4 (coma or vegetative state)           | 6.7%        | 2.1%        | 21.0%            | 33.3%          | 1.0%  | 35.9%   |

**Table S3.** Adjusted Associations between Patient Characteristics and 1-Year Survival, Full Model Results

| Variable                                 | Adjusted Rate Ratio (95% CI) | P Value |
|------------------------------------------|------------------------------|---------|
| Age                                      |                              |         |
| 65 to 74 yr                              | 1.00 [Reference]             | —       |
| 75 to 84 yr                              | 0.92 (0.88-0.96)             | <0.001  |
| ≥85 yr                                   | 0.78 (0.73-0.84)             | <0.001  |
| Sex                                      |                              |         |
| Female                                   | 1.04 (1.00-1.08)             | 0.03    |
| Male                                     | 1.00 [Reference]             |         |
| Race                                     |                              |         |
| White                                    | 1.00 [Reference]             | —       |
| Black                                    | 0.87 (0.81-0.95)             | 0.001   |
| Other                                    | 1.04 (0.90-1.20)             | 0.63    |
| Initial cardiac arrest rhythm            |                              |         |
| Pulseless electrical activity            | 1.00 [Reference]             | —       |
| Asystole                                 | 1.02 (0.96-1.09)             | 0.44    |
| Pulseless ventricular tachycardia        | 1.02 (0.95-1.09)             | 0.60    |
| Ventricular fibrillation                 | 1.09 (1.04-1.15)             | 0.001   |
| CPC score at discharge                   |                              |         |
| 1 (mild to no neurological disability)   | 1.00 [Reference]             | —       |
| 2 (moderate neurological disability)     | 0.84 (0.80-0.88)             | <0.001  |
| 3 (severe neurological disability)       | 0.58 (0.52-0.65)             | <0.001  |
| 4 (coma or vegetative state)             | 0.14 (0.09-0.23)             | <0.001  |
| Principal reason for index admission     |                              |         |
| Acute respiratory failure                | 0.86 (0.76-0.98)             | 0.03    |
| Cardiac arrest                           | 1.06 (0.94-1.20)             | 0.36    |
| Coronary artery disease                  | 1.08 (1.02-1.15)             | 0.01    |
| Heart failure                            | 0.86 (0.77-0.96)             | 0.01    |
| Malignant and metastatic cancer          | 0.84 (0.72-0.97)             | 0.02    |
| Myocardial infarction or ischemia        | 1.00 [Reference]             | —       |
| Other cardiovascular diagnosis           | 1.04 (0.98-1.10)             | 0.17    |
| Other pulmonary diagnosis                | 0.79 (0.70-0.89)             | <0.001  |
| Renal disease                            | 0.82 (0.70-0.97)             | 0.02    |
| Other                                    | 0.98 (0.92-1.05)             | 0.57    |
| Preexisting conditions                   |                              |         |
| Acute stroke                             | 0.91 (0.80-1.04)             | 0.18    |
| Baseline depression in CNS function      | 0.97 (0.89-1.05)             | 0.43    |
| Diabetes mellitus                        | 0.94 (0.90-0.98)             | 0.003   |
| Heart failure during admission           | 0.92 (0.87-0.97)             | 0.003   |
| Heart failure prior to admission         | 0.85 (0.80-0.90)             | <0.001  |
| Hepatic insufficiency                    | 1.01 (0.86-1.19)             | 0.91    |
| Hypotension                              | 1.03 (0.97-1.08)             | 0.36    |
| Major trauma                             | 1.06 (0.90-1.24)             | 0.50    |
| Metabolic or electrolyte abnormality     | 0.91 (0.84-0.99)             | 0.03    |
| Metastatic or hematologic malignancy     | 0.77 (0.69-0.86)             | <0.001  |
| Myocardial infarction during admission   | 1.04 (1.00-1.09)             | 0.07    |
| Myocardial infarction prior to admission | 1.00 (0.96-1.04)             | 0.90    |
| Pneumonia                                | 0.86 (0.79-0.94)             | 0.001   |
| Respiratory insufficiency                | 0.94 (0.90-0.98)             | 0.01    |
| Renal insufficiency                      | 0.84 (0.79-0.89)             | <0.001  |
| Septicemia                               | 0.79 (0.70-0.89)             | <0.001  |

Abbreviations: CNS, central nervous system; and CPC, Cerebral Performance Category .

**Table S4.** Temporal Trends in 1-Year Unadjusted Survival, Stratified by Rhythm Type

|                            | 2000  | 2001  | 2002  | 2003  | 2004  | 2005  | 2006  | 2007  | 2008  |
|----------------------------|-------|-------|-------|-------|-------|-------|-------|-------|-------|
| <b>Asystole / PEA*</b>     |       |       |       |       |       |       |       |       |       |
| No. Alive at 1 Year        | 34    | 93    | 170   | 245   | 283   | 293   | 236   | 257   | 316   |
| No. Discharged             | 47    | 176   | 336   | 462   | 509   | 558   | 505   | 527   | 618   |
| Survival Rate              | 72.3% | 52.8% | 50.6% | 53.0% | 55.6% | 52.5% | 46.7% | 48.8% | 51.1% |
| <b>VF / Pulseless VT**</b> |       |       |       |       |       |       |       |       |       |
| No. Alive at 1 Year        | 76    | 167   | 258   | 296   | 306   | 320   | 272   | 248   | 210   |
| No. Discharged             | 106   | 246   | 378   | 451   | 472   | 455   | 402   | 383   | 341   |
| Survival Rate              | 71.7% | 67.9% | 68.3% | 65.6% | 64.8% | 70.3% | 67.7% | 64.8% | 61.6% |

Abbreviations: PEA, pulseless electrical activity; VF, ventricular fibrillation; and VT, ventricular tachycardia

\* *P* for trend = 0.32

\*\* *P* for trend = 0.49

**Table S5.** Risk-Adjusted Rates of 2-Year Survival for Pre-Specified Subgroups\*

| Subgroup                               | Unadjusted Survival, % | Risk-Adjusted Survival, % | Adjusted Rate Ratio (95% CI) | <i>P</i> Value |
|----------------------------------------|------------------------|---------------------------|------------------------------|----------------|
| Age                                    |                        |                           |                              |                |
| 65 to 74 yr                            | 55.8                   | 55.8                      | 1.00 [Reference]             | —              |
| 75 to 84 yr                            | 46.9                   | 48.6                      | 0.87 (0.83-0.91)             | <0.001         |
| ≥85 yr                                 | 35.7                   | 40.2                      | 0.72 (0.66-0.79)             | <0.001         |
| Sex                                    |                        |                           |                              |                |
| Female                                 | 49.7                   | 52.5                      | 1.06 (1.01-1.11)             | 0.03           |
| Male                                   | 49.5                   | 49.5                      | 1.00 [Reference]             | —              |
| Race                                   |                        |                           |                              |                |
| White                                  | 51.2                   | 51.2                      | 1.00 [Reference]             | —              |
| Black                                  | 36.1                   | 45.6                      | 0.89 (0.81-0.97)             | 0.009          |
| Other                                  | 44.5                   | 51.7                      | 1.01 (0.86-1.20)             | 0.87           |
| Initial cardiac arrest rhythm          |                        |                           |                              |                |
| Pulseless electrical activity          | 41.8                   | 41.8                      | 1.00 [Reference]             | —              |
| Asystole                               | 43.8                   | 41.8                      | 1.00 (0.94-1.07)             | 0.94           |
| Pulseless ventricular tachycardia      | 50.1                   | 41.4                      | 0.99 (0.91-1.07)             | 0.75           |
| Ventricular fibrillation               | 61.6                   | 46.4                      | 1.11 (1.04-1.18)             | 0.001          |
| CPC score at discharge                 |                        |                           |                              |                |
| 1 (mild to no neurological disability) | 63.6                   | 63.6                      | 1.00 [Reference]             | —              |
| 2 (moderate neurological disability)   | 44.7                   | 52.1                      | 0.82 (0.77-0.86)             | <0.001         |
| 3 (severe neurological disability)     | 26.3                   | 33.7                      | 0.53 (0.46-0.60)             | <0.001         |
| 4 (coma or vegetative state)           | 7.7                    | 9.5                       | 0.15 (0.10-0.24)             | <0.001         |

Abbreviations: CI, confidence interval; and CPC, Cerebral Performance Category.

\* Models adjusted for the variables listed in Table S1.

**Table S6.** Adjusted Associations between Select Patient Characteristics and 2-Year Readmission\*

| Variable                               | Adjusted Hazard Ratio<br>(95% CI) | <i>P</i> Value |
|----------------------------------------|-----------------------------------|----------------|
| Age                                    |                                   |                |
| 65 to 74 yr                            | 1.00 [Reference]                  | —              |
| 75 to 84 yr                            | 1.05 (0.98-1.13)                  | 0.16           |
| ≥85 yr                                 | 1.09 (0.97-1.21)                  | 0.13           |
| Sex                                    |                                   |                |
| Female                                 | 1.10 (1.03-1.17)                  | 0.006          |
| Male                                   | 1.00 [Reference]                  | —              |
| Race                                   |                                   |                |
| White                                  | 1.00 [Reference]                  | —              |
| Black                                  | 1.18 (1.05-1.32)                  | 0.006          |
| Other                                  | 1.00 (0.79-1.26)                  | 0.99           |
| Initial cardiac arrest rhythm          |                                   |                |
| Pulseless electrical activity          | 1.00 [Reference]                  | —              |
| Asystole                               | 0.97 (0.89-1.06)                  | 0.50           |
| Pulseless ventricular tachycardia      | 1.02 (0.91-1.13)                  | 0.76           |
| Ventricular fibrillation               | 0.92 (0.84-1.01)                  | 0.09           |
| CPC score at discharge                 |                                   |                |
| 1 (mild to no neurological disability) | 1.00 [Reference]                  | —              |
| 2 (moderate neurological disability)   | 1.21 (1.11-1.31)                  | <0.001         |
| 3 (severe neurological disability)     | 1.28 (1.13-1.44)                  | 0.001          |
| 4 (coma or vegetative state)           | 0.87 (0.59-1.28)                  | 0.48           |
| Preexisting conditions                 |                                   |                |
| Diabetes mellitus                      | 1.21 (1.13-1.30)                  | <0.001         |
| Heart failure prior to admission       | 1.25 (1.15-1.35)                  | <0.001         |
| Metastatic or hematologic malignancy   | 1.15 (1.00-1.32)                  | 0.05           |
| Renal insufficiency                    | 1.31 (1.21-1.43)                  | <0.001         |

Abbreviations: CI, confidence interval; and CPC, Cerebral Performance Category.

\* Models adjusted for the variables listed in Table S1.
